# Supplementary material
Source: publisher figshare collection journal article supplement (https://acs.figshare.com/ndownloader/files/5719659)
Supplement: Supplementary file 1 [file 5719659]

## Supporting information

### A Fundamentally New Approach to Enantioselective Fluorination based on Cinchona Alkaloid Derivatives/Selectfluor Combination

Norio Shibata, Emiko Suzuki, and Yoshio Takeuchi

#### Reference (11)

##### A typical experimental procedure for the fluorination of **1a**.

A solution of **1a** (40 mg, 0.136 mmol) in MeCN (3ml) was added to DHQB/Selectfluor combination [prepared in situ from DHQB (98%, 78 mg, 0.163 mmol) and Selectfluor (95%, 60 mg, 0.163 mmol) in MeCN (3 ml) stirred in the presence of MS 3Å at room temperature for 1h] at -20 °C under nitrogen atmosphere. After stirring overnight, water was added to the reaction mixture and it was extracted with AcOEt. The organic phase was washed with 5% HCl, sat. NaHCO<sub>3</sub>, brine and dried over Na<sub>2</sub>SO<sub>4</sub>. The solvent was removed under reduced pressure to give a crude oil, which was purified by preparative TLC on silica-gel eluting with 20% AcOEt in hexane to give **2a** (32.2 mg, 99%) as a colorless oil. Ee was determined to 89% by HPLC analysis using a Chiralcel OB eluting with 10% isopropanol in hexane. Spectral data for **2a** corresponded to literature value (ref. [6a]).

##### Fluorination of **1b**

Fluorination of **1b** (40 mg, 0.183 mmol), DHQB/Selectfluor combination [prepared in situ from DHQB (98%, 102 mg, 0.215 mmol) and Selectfluor (97%, 78 mg, 0.214 mmol) in MeCN (2 ml) stirred in the presence of MS 3Å at room temperature for 1h] in MeCN (3 ml) at -20 °C gave **2b** (27.9 mg, 93%) as a colorless oil. Ee was determined to 54% by HPLC analysis using a Chiralcel OB eluting with 1% isopropanol in hexane. Spectral data for **2b** corresponded to literature value (ref. [6a]).

##### Fluorination of **1c**

Fluorination of **1c** (40 mg, 0.172 mmol), DHQB/Selectfluor combination [prepared in situ from DHQB (98%, 96 mg, 0.202 mmol) and Selectfluor (97%, 73 mg, 0.200 mmol) in MeCN (2 ml) stirred in the presence of MS 3Å at room temperature for 1h] in MeCN (3 ml) at -20 °C gave **2c** (37.5 mg, 99%) as a colorless oil. Ee was determined to 73% by HPLC analysis using a Chiralcel OB eluting with 1% isopropanol in hexane. Spectral data for **2c** corresponded to literature value (ref. [6a]).

### Fluorination of **1d**

Fluorination of **1d** (40 mg, 0.172 mmol), DHQB/Selectfluor combination [prepared in situ from DHQB (98%, 96 mg, 0.202 mmol) and Selectfluor (97%, 73 mg, 0.200 mmol) in MeCN (2 ml) stirred in the presence of MS 3Å at room temperature for 1h] in MeCN (3 ml) at -20 °C gave **2d** (29.0 mg, 94%) as a colorless oil. Ee was determined to 42% by HPLC analysis using a Chiralcel OB eluting with 5% isopropanol in hexane. Spectral data for **2d** corresponded to literature value (ref. [6a]).

### Fluorination of **1e**

Fluorination of **1e** (30 mg, 0.122 mmol), DHQB/Selectfluor combination [prepared in situ from DHQB (98%, 116 mg, 0.244 mmol) and Selectfluor (97%, 67 mg, 0.183 mmol) in MeCN (3 ml) stirred in the presence of MS 3Å at room temperature for 1h] in CH<sub>2</sub>Cl<sub>2</sub> (4 ml) at -50 °C gave **2e** (16.7 mg, 71%) as a colorless oil. Ee was determined to 67% by HPLC analysis using a Chiralcel OB eluting with 1% isopropanol in hexane. Spectral data for **2e** corresponded to literature value (ref. [6a]).

### Fluorination of **1f**

Fluorination of **1f** (40 mg, 0.129 mmol), DHQB/Selectfluor combination [prepared in situ from DHQB (98%, 73 mg, 0.154 mmol) and Selectfluor (97%, 55 mg, 0.151 mmol) in MeCN (2 ml) stirred in the presence of MS 3Å at room temperature for 1h] in MeCN (3 ml) at -20 °C gave **2d** (31.3 mg, 95%) as a colorless oil. Ee was determined to 71% by HPLC analysis using a Chiralcel OB eluting with 10% isopropanol in hexane. Spectral data for **2d** corresponded to literature value (ref. [6a]).

### A typical experimental procedure for the fluorination of **4a**.

A solution of **4a** (50 mg, 0.246 mmol) in CH<sub>2</sub>Cl<sub>2</sub> (4 ml) was added to DHQDA/Selectfluor combination [prepared in situ from DHQDA (181 mg, 0.491 mmol) and Selectfluor (95%, 138 mg, 0.390 mmol) in MeCN (3 ml) in the presence of MS 3Å at room temperature for 1h] at -80 °C under nitrogen atmosphere. After stirring for 2 h, water was added to the reaction mixture and extracted with AcOEt. The work-up similar to the fluorination of **1a** gave **3a** (43.5 mg, 80%) as a colorless oil. Ee was determined to 87% by HPLC analysis using a Chiralcel OB eluting with 1% ethanol in hexane. Spectral data for **3a** corresponded to literature value (ref. [14b]).

**Fluorination of 4b**

Fluorination of **4b** (20 mg, 0.0893 mmol) with DHQDA/Selectfluor combination [prepared in situ from DHQDA (66 mg, 0.177 mmol) and Selectfluor (97%, 49 mg, 0.134 mmol) in MeCN (3 ml) in the presence of MS 3Å at room temperature for 1h] in CH<sub>2</sub>Cl<sub>2</sub> (4 ml) at -80 °C gave **3b** (18.7 mg, 87%) as colorless crystals. Ee was determined to 76% by HPLC analysis using a Chiralpak AD eluting with 2% ethanol in hexane. Spectral data for **3b** corresponded to literature value (ref. [15]).

**Fluorination of 4c**

Fluorination of **4c** (50 mg, 0.265 mmol) with DHQDA/Selectfluor combination [prepared in situ from DHQDA (195 mg, 0.529 mmol) and Selectfluor (97%, 145 mg, 0.397 mmol) in MeCN (3 ml) in the presence of MS 3Å at room temperature for 1h] in CH<sub>2</sub>Cl<sub>2</sub> (4 ml) at -80 °C gave **3c** (44.2 mg, 81%) as a colorless oil. Ee was determined to 83% by HPLC analysis using a Chiralcel OJ eluting with 1% isopropanol in hexane. Spectral data for **4c** corresponded to literature value (ref. [16] and Takeuchi, Y., Itoh, N., Satoh, T., Koizumi, T., Yamaguchi, K, *J. Org. Chem.* **1993**, *58*, 1812—1820.).

**Fluorination of 4d**

Fluorination of **4d** (20 mg, 0.0921 mmol) with DHQDA/Selectfluor combination [prepared in situ from DHQDA (68 mg, 0.184 mmol) and Selectfluor (97%, 51 mg, 0.138 mmol) in MeCN (3 ml) in the presence of MS 3Å at room temperature for 1h] in CH<sub>2</sub>Cl<sub>2</sub> (4 ml) at -80 °C gave **3d** (17.5 mg, 81%) as a colorless oil. Ee was determined to 76% by HPLC analysis using a Chiralpak AS eluting with 1% isopropanol in hexane. <sup>1</sup>H NMR δ 7.36—7.57 (m, 2H, ArH), 7.32—7.35 (m, 2H, ArH), 3.90 (s, 3H, OMe), 2.95 (m, 1H, CHMe<sub>2</sub>), 2.52 (d, *J* = 6.83 Hz, 6H, Me<sub>2</sub>CH). <sup>19</sup>F NMR δ -144.3 (s).

**Fluorination of 4e**

Fluorination of **4e** (40 mg, 0.196 mmol) with DHQDA/Selectfluor combination [prepared in situ from DHQDA (144 mg, 0.392 mmol) and Selectfluor (97%, 107 mg, 0.294 mmol) in MeCN (3 ml) in the presence of MS 3Å at room temperature for 1h] in CH<sub>2</sub>Cl<sub>2</sub> (4 ml) at -80 °C gave **3e** (38.7 mg, 89%) as a colorless oil. Ee was determined to 78% by HPLC analysis using a Chiralcel OJ eluting with 1% isopropanol in hexane. <sup>1</sup>H NMR δ 7.82 (m, 1H, ArH), 7.71 (m, 1H, ArH), 7.48 (m, 2H, ArH), 4.28 (q, *J* = 7.1 Hz, 2H, CH<sub>2</sub>Me), 3.80 (dd, *J* = 11.6, 17.7 Hz, 1H, CHHAr), 3.43 (dd, *J* = 23.3, 17.8 Hz, 1H, CHHAr), 1.26 (t, *J* = 7.2 Hz, 3H, Me). <sup>19</sup>F NMR δ -164.9 (dd, *J* = 12.0, 23.5 Hz)

### Fluorination of 4f

Fluorination of **4f** (30 mg, 0.146 mmol) with DHQDA/Selectfluor combination [prepared in situ from DHQDA (107 mg, 0.292 mmol) and Selectfluor (95%, 81 mg, 0.218 mmol) in MeCN (3 ml) in the presence of MS 3Å at room temperature for 1h] in CH<sub>2</sub>Cl<sub>2</sub> (4 ml) at -80 °C gave **3f** (30.1 mg, 92%) as a colorless oil. Ee was determined to 80% by HPLC analysis using a Chiralcel OJ eluting with 10% isopropanol in hexane. <sup>1</sup>H NMR δ 7.74 (m, 2H, ArH), 7.25 (m, 2H, ArH), 4.35 (qd, *J* = 7.3, 1.2 Hz, 2H, CH<sub>2</sub>), 1.31 (t, *J* = 7.2 Hz, 3H, Me). <sup>19</sup>F NMR δ -127.43 (s).

### Reference (18)

#### NMR Studies of the DHQB/Selectfluor Combination

This structure of the species produced by the DHQB/Selectfluor combination was examined by <sup>19</sup>F NMR spectroscopy (CFCl<sub>3</sub> was used as a reference). The 254 MHz <sup>19</sup>F NMR spectrum of Selectfluor in CD<sub>3</sub>CN at room temperature showed a singlet peak at 49 ppm due to fluorine originated from the *N*-F, whereas the spectrum of DHQB/Selectfluor (0.5:1) combination in CD<sub>3</sub>CN gave two singlet peaks at 49 ppm and 44 ppm. As we expected, the signal at 49 ppm disappeared completely with the addition of DHQB (0.1—1.0 equiv). Thus, the <sup>19</sup>F NMR spectrum of DHQB/Selectfluor (1:1) combination showed only a singlet peak at 44 ppm. The characteristic signal at 44 ppm clearly confirmed a new *N*-F structure over that of a reactive species. These initial NMR spectroscopic studies strongly support the proposed structure of *N*F-DHQB·BF<sub>4</sub> in solution, although further investigation for this structure is necessary.

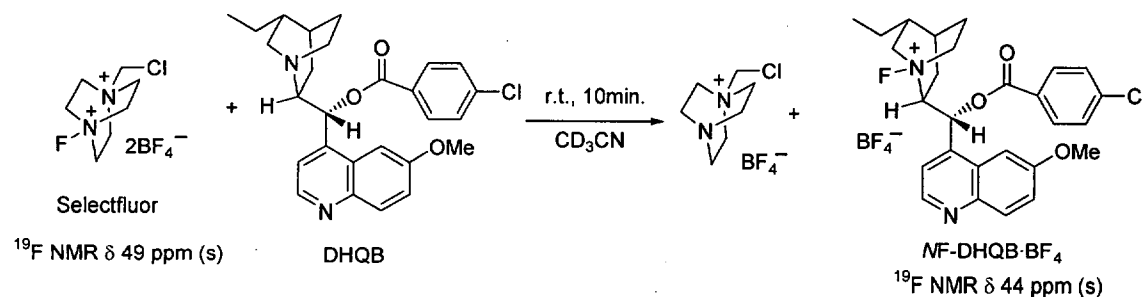

**Scheme. Transfer-fluorination of DHQB (0.1 —1.0equiv) with Selectfluor (1.0 equiv) in CD<sub>3</sub>CN.**

(Also see Figure on the next page)

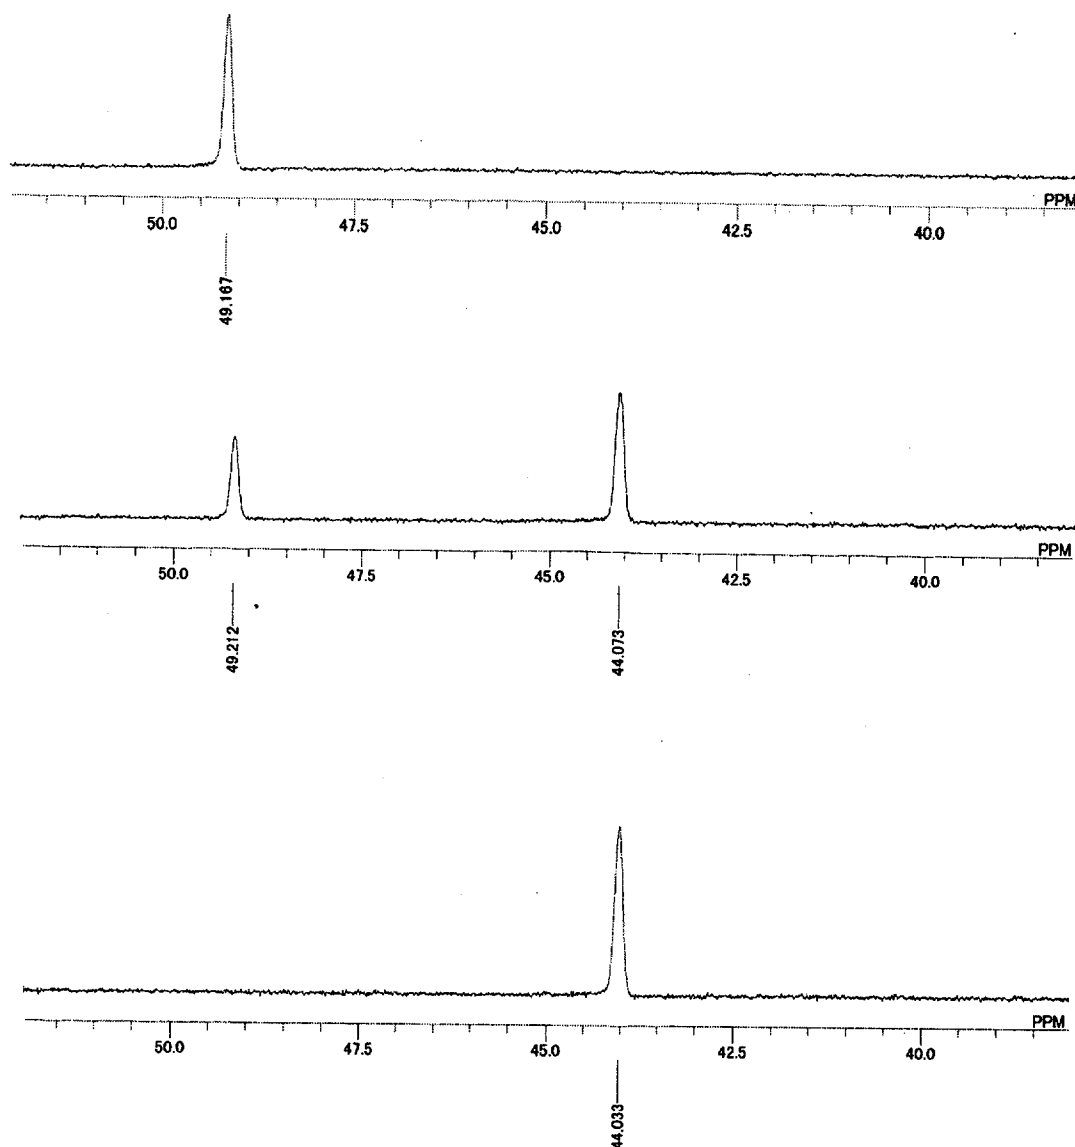

**Figure**

**The 254 MHz  $^{19}\text{F}$  NMR spectrum of Selectfluor and the combination in  $\text{CD}_3\text{CN}$ .**

Top: Downfield region of the  $^{19}\text{F}$  NMR spectrum of Selectfluor in  $\text{CD}_3\text{CN}$ .

Middle: The same region after the addition 0.5 equiv. of DHQB.

Bottom: The same region after the addition 1.0 equiv. of DHQB, leading to the quantitative formation of  $\text{NF-DHQB-BF}_4$ .
